# Supplementary material
Source: PubMed Central journal article supplement (PMC5710539)
Supplement: jamaophthalmol-135-918-s001.pdf [file jamaophthalmol-135-918-s001.pdf]

17 **RESEARCH SUBJECT INFORMATION AND CONSENT FORM**  
18  
19

20 **1.1 TITLE:**

21 **1.2 A Single-center, Prospective Study Evaluating the Safety and**  
22 **Efficacy of YAG Vitreolysis for Symptomatic Weiss Ring Due**  
23 **to Posterior Vitreous Detachment**  
24

25 **1.3 PROTOCOL NO.: YAG-001**

26 **SPONSOR: Center for Eye Research and Education, Boston, MA**  
27  
28

29 **1.4 INVESTIGATOR: Chirag P. Shah, MD, MPH**

30  
31 **PHONE NUMBER: (800) 635-0489**  
32

33 **SITE(S): Ophthalmic Consultants of Boston**  
34 **50 Staniford Street, Suite 600**  
35 **Boston, MA 02114**  
36

37 **VERSION & DATE: Version 1, October 25, 2014**

38 **1.5**  
39

40 You are invited to participate in a research study. However, before you give your  
41 consent to be a volunteer, we want you to read this consent form and ask as  
42 many questions as necessary to be sure that you understand what your  
43 participation will involve.  
44

45 **NATURE AND PURPOSE OF THE STUDY**  
46

47 You are being asked to participate in this study because you have symptoms of  
48 floaters from a posterior vitreous detachment (PVD). Currently standard of  
49 management for floaters is observation, although treatment with a surgery called  
50 vitrectomy is sometimes performed. The purpose of this study is to evaluate the  
51 safety and efficacy of treating the floater with an in-office YAG (yttrium aluminum  
52 garnet) laser procedure. The YAG laser is not approved by the Food and Drug  
53 Administration (FDA) to treat floaters but is FDA approved to remove a film that  
54 occasionally grows behind a lens implant after cataract surgery (posterior  
55 capsulotomy) and to make a small hole in the colored part of the eye to treat  
56 glaucoma (iridotomy). All eligible participants will be assigned randomly (like the

57 flip of a coin) to receive either the YAG laser (67% chance) or a fake (sham)  
58 laser (33% chance) procedure. Follow-up visits will occur at one week, one  
59 month, three months, and six months after the laser procedure. There will be a  
60 total of 5 study visits lasting six months. Only one laser session will be  
61 performed at the first study visit.

62  
63

## 64 **SUBJECT SELECTION**

65

66 You are being offered an opportunity to participate in this research study  
67 because you are symptomatic with floaters in an eye for at least 6 months that  
68 correlates to a floater observed in the eye called a posterior vitreous detachment  
69 Weiss ring.

70

71 The study will enroll 75 participants at Ophthalmic Consultants of Boston in a 2:1  
72 randomization of YAG laser to fake (sham) laser.

73

74

## 75 **STUDY DURATION**

76

77 A screening visit is required and will take place on the same day as the start of  
78 the research study to determine if you qualify and are willing to participate. If the  
79 study doctor decides you are qualified and you agree to participate in this study,  
80 you will receive either the YAG laser procedure or sham laser procedure, followed  
81 by check-ups one week, one month, three months, and six months after your  
82 procedure. The study duration is a total of 6 months.

83

## 84 **STUDY PROCEDURES**

85 Should you decide to participate, you will first sign this Subject Information and  
86 Consent Form before any study-related procedures are performed. You will be  
87 asked about your medical history, family history, and demographic information.  
88 The following is a description of the procedures that will be performed during this  
89 study:

90

### 91 **Eye Exams**

92 At each visit you will have an eye examination. Your vision will be checked at  
93 each study visit. You will receive a numbing eye drop so that the eye pressure  
94 can be checked. The fluid pressure in the eye will be checked with a device  
95 called applanation tonometry. Your pupils will be dilated with eye drops so that  
96 the study doctor can examine your eye (slit lamp/indirect ophthalmoscopy). The  
97 study doctor will then use special lenses to look at your retina under high  
98 magnification and will gently push on the outside of the eye during exam (scleral  
99 depression). These procedures are all part of a standard retina exam by an eye  
100 doctor.

101

102 At the first and last visits, you will also have a picture of the retina taken by a  
103 device called spectral domain optical coherence tomography (SD-OCT), a  
104 photograph picture of your retina taken by a machine called Optos, and an  
105 ultrasound imaging test (B-scan) of the floaters.

106  
107 At the first visit, you will have an ultrasound test (A-scan) to determine the axial  
108 length of the study eye.

109  
110 Questionnaires  
111 At the first and last visits, you will complete two questionnaires about your  
112 floaters and about how your vision affects your daily life (VFQ-25).

113  
114 **YAG or Sham Laser Procedure**  
115 During your first visit, you will receive either a YAG laser or a sham  
116 laser procedure. You will not know which group you will be a part of. The laser  
117 procedure will begin with a numbing drop placed into the eye. Then a lens will be  
118 placed on the eye to focus the laser. The laser will then be performed.  
119 Afterwards, the lens will be removed and the fluid pressure inside the eye will be  
120 checked 30 minutes after the procedure using a device called applanation  
121 tonometry.

122  
123

124 **PHYSICIAN AVAILABILITY**  
125  
126 A physician will be present at the time of the laser or sham laser procedure and  
127 on-call at all other times. In the event of any type of medical emergency, the  
128 study doctor will be on call and available, throughout the study.

129  
130 **RISK AND DISCOMFORTS**

131  
132 Likely effects and risk of research on the subjects:

133  
134 Risks of Laser Treatment  
135 The risks of YAG laser treatment that occur in about 1 in every 100 patients are  
136 an increased eye pressure, glaucoma and cataract formation. Risks that occur in  
137 about 1 in every 1000 patients are eye inflammation, retinal tear, retinal  
138 detachment, retinal edema, and optic nerve injury.. The minor side effects  
139 include conjunctival hemorrhage (bleeding outside the eye), eye redness and  
140 irritation, headache, or new floaters.

141  
142 Anesthetic drops and a contact lens will be used as part of the laser procedure.  
143 Risks associated with their use include allergic reaction, infection, and corneal  
144 abrasion (scratch on the clear front surface of the eye). If any of these problems  
145 occur, they will be treated and usually clear up rapidly.

146  
147 Risks of Intraocular Pressure Test

148 The instrument used to measure the pressure inside your eye could cause a  
149 corneal abrasion (scratch on the clear front surface of your eye). If this occurs, it  
150 will be treated and usually clears up rapidly.

151

## 152 **BENEFITS**

153

154 It is understood that participation in this study may not derive any direct medical  
155 benefits to you. You may have a good response to treatment; however, it is  
156 possible that you may not see an improvement in your condition. Information  
157 from your participation in this study may benefit persons with symptomatic  
158 floaters from posterior vitreous detachment Weiss ring in the future.

159

160

## 161 **COSTS AND REIMBURSTMENTS**

162

163 You will not receive payment for your participation in this study.

164

### 165 ***Research Procedures***

166

167 The laser procedure, eye exams, and all imaging tests will be provided free of  
168 charge through the Center for Eye Research

169

170

## 171 **IN CASE OF INJURY**

172

173 It is important that you tell your study doctor if you feel that you have been injured  
174 because of taking part in this study. You can tell the study doctor in person or call  
175 him or her at the telephone number listed on the first page of this form. You will  
176 get medical treatment if you are injured as a result of taking part in this study.  
177 Your study doctor will explain the treatment options to you and tell you where you  
178 can get treatment.

179

180 The study sponsor will pay for the reasonable costs of all diagnostic procedures  
181 and medical treatment for illness or injuries that are the result of your  
182 participation in the study, if the costs are not covered by your medical insurance.  
183 In the case of injury resulting from the study, you do not lose any of your legal  
184 rights to seek payment or any other legal rights by signing this form.

185

## 186 **PREGNANCY STATEMENT**

187

188 YAG laser procedure does not pose any risk for patients who are pregnant.

189

190

191 **TREATMENT ALTERNATIVE**

192

193 Taking part in this study is voluntary. Your study doctor will keep you informed of  
194 other treatment options which may include one of the following options:

195

196

- Observation

197

- Pars plana vitrectomy which is surgical removal of the vitreous in the  
198 operating room

199

200 Please discuss these and other options with your doctor and the study doctor.

201

202

203 **OFFER TO ANSWER ANY QUESTIONS ABOUT THIS STUDY**

204

205 If you have any questions or problems during this study, or if you think that you  
206 may have experienced a research-related injury, you should contact Dr. Chirag  
207 Shah at (800) 635-0489.

208

209 If you have any questions regarding your rights as a research volunteer, please  
210 contact Sterling Institutional Review Board at 888-636-1062 during regular  
211 working hours. Sterling Institutional Review Board is a committee established for  
212 the purpose of protecting the rights of volunteers in a research study.

213

214

215 **USE AND DISCLOSURE OF MEDICAL INFORMATION**

216

217 As part of this study, Dr. Shah, the Study Doctor, and his team at the research  
218 facility will keep records of your participation in this study. These study records  
219 will include personal information that you provide including your age, sex, etc.,  
220 the results of procedures and tests you undergo during the study or had before  
221 the study, information about your response to treatments you receive under the  
222 study, and other medical information relating to your participation in the study.  
223 Under federal law your study records cannot be used or disclosed for research  
224 purposes unless you sign this authorization. You may not participate in the study  
225 unless you sign this authorization. If you sign this informed consent form, you will  
226 be agreeing to the disclosures described below:

227

228

- a. Your study records and medical records may also be reviewed by Sterling  
229 Institutional Review Board which is an ethics committee that reviews the  
230 conduct of human research studies.

231

232 The research facility and the Sterling Institutional Review Board will review and  
233 use your study records only for purposes of this study. They will keep your  
234 identity confidential and, except for the disclosures described above, will not  
235 disclose your study records to other parties unless disclosure is required by law.  
236 Once the research facility discloses information in your study records or medical

237 records to the Sponsor or its consultants, the information will no longer be  
238 protected by federal law. Because of the need to release information to these  
239 parties, absolute confidentiality cannot be guaranteed. However, the investigator  
240 will only use your information for purposes of the study and will not disclose your  
241 study records to parties unless disclosure is required by law. If reports or articles  
242 are written about the study, you will not be identified by name in them. Your study  
243 records may be retained at the research facility indefinitely following the  
244 completion of the study. You will not have the right to review your records while  
245 the research is in progress. However, you will be able to review your records  
246 after the research has been completed.

247  
248 This authorization has no expiration date. However, you have the right to revoke  
249 this authorization at any time. You can do this by giving written notice to the  
250 study doctor, informing them that you are revoking your authorization to use and  
251 disclose medical information. The study doctor's contact information is on page  
252 1 of this document.

253  
254 If you revoke this authorization to use and disclose your medical information, you  
255 will not be permitted to continue your participation in the study after the  
256 revocation. If you drop out of the study, you do not have to revoke your  
257 authorization to use and disclose your medical information. However, if you drop  
258 out of the study and do decide to revoke your authorization to use and disclose  
259 your medical information, the information that has already been collected in your  
260 study record may continue to be used and disclosed as described above,  
261 however, no new information will be obtained or added.

262

263

## 264 **CLOSING STATEMENT**

265

266 You have read and understood the information which has been stated above and  
267 have received satisfactory answers to all of questions which you have asked and  
268 you willingly sign this consent form. You will receive a copy of the signed  
269 informed consent. You hereby consent to be a participant in this study.

270

271

272 **PATIENT'S DECLARATION:**

273

274 **RIGHT TO WITHDRAW OR REMOVAL FROM STUDY**

275

276 I understand that I am free to withdraw from this study at any time, and I agree to  
277 inform the physician immediately if I intend to withdraw. It is understood that my  
278 decision to participate in this study or to withdraw from this study will not  
279 influence the availability of my future medical care and will involve no penalty or  
280 loss of benefits to which I am otherwise entitled.

281

282 I agree that the physician in charge of the study can remove me from this study  
283 without my consent for any reason, including, but not limited to:

284 a. His/her judgment that any condition or circumstance that may jeopardize my  
285 welfare or the integrity of the study.

286 b. My failure to follow the instructions of the investigator(s).

287 c. If the study is stopped by the sponsor and/or doctors participating in the study  
288 prior to completion.

289

290 **SIGNATURES**

291

292 I have read in a language that I understand well, the above information, 7 pages  
293 total. The content and meaning of this information has been explained to me. I  
294 hereby voluntarily consent and offer to take part in this study and authorize the  
295 use and disclosure of my medical information.

296

297

298

299

|                   |       |                    |
|-------------------|-------|--------------------|
| _____             | _____ | _____              |
|                   | Date  | Print Subject Name |
| Subject Signature |       |                    |

300

301

302

303

304

305

306

307

308

309

310

|       |                                                                 |                                                                         |
|-------|-----------------------------------------------------------------|-------------------------------------------------------------------------|
| _____ | _____                                                           | _____                                                                   |
| Date  | Name of Person conducting<br>the Informed Consent<br>discussion | Signature of Person<br>conducting the<br>Informed Consent<br>discussion |

311  
312

313

|                                                                                                                                                                                                                                                     |
|-----------------------------------------------------------------------------------------------------------------------------------------------------------------------------------------------------------------------------------------------------|
| <p style="text-align: center;"><b>Clinical Study Protocol</b><br/>A Single-center, Prospective Study Evaluating the Safety and Efficacy of YAG<br/>Vitreolysis versus Sham for Symptomatic Weiss Ring Due to Posterior Vitreous<br/>Detachment.</p> |
|-----------------------------------------------------------------------------------------------------------------------------------------------------------------------------------------------------------------------------------------------------|

|                                |                                |
|--------------------------------|--------------------------------|
| <b>Clinical Phase:</b>         | Prospective, Phase II          |
| <b>Protocol #:</b>             | YAG-001                        |
| <b>Date:</b>                   | Amendment 1<br>26 January 2015 |
| <b>Principle Investigator:</b> | Chirag P. Shah, MD, MPH        |



## Clinical Study Protocol Synopsis

**TITLE**

A Single-center, Prospective  
Study Evaluating the Safety  
and Efficacy of YAG  
Vitreolysis versus Sham for  
Symptomatic Weiss Ring Due  
to Posterior Vitreous  
Detachment.

---

|                               |                                                                                          |
|-------------------------------|------------------------------------------------------------------------------------------|
| <b>SITE LOCATION(S)</b>       | Ophthalmic Consultants of Boston,<br>50 Staniford Street, Suite 600,<br>Boston, MA 02114 |
| <b>PRINCIPAL INVESTIGATOR</b> | Chirag P. Shah, MD, MPH                                                                  |

---

|                       |                                                                                                          |
|-----------------------|----------------------------------------------------------------------------------------------------------|
| <b>STUDY DURATION</b> | 24 months (includes an 18-month enrollment period, and an observation visit at month 6 for each subject) |
|-----------------------|----------------------------------------------------------------------------------------------------------|

---

|                                        |               |
|----------------------------------------|---------------|
| <b>ESTIMATED STUDY COMPLETION DATE</b> | December 2016 |
|----------------------------------------|---------------|

---

|                           |                                                                                                           |
|---------------------------|-----------------------------------------------------------------------------------------------------------|
| <b>POPULATION</b>         |                                                                                                           |
| <b>SAMPLE SIZE:</b>       | 75 subjects                                                                                               |
| <b>TARGET POPULATION:</b> | Treatment-naive patients with symptomatic Weiss ring for at least 6 months who accept the risks of laser. |

---

---

**TREATMENT(S)****Laser**

Iridex yttrium aluminum garnet (YAG) laser

**Procedure:**

Subjects will be randomized in a 2:1 ratio to YAG vitreolysis versus sham YAG. Patients will have intraocular pressure checked by applanation tonometry before and 30 minutes post-procedure. Patients will be dilated with phenylephrine 2.5% and tropicamide 1% and receive proparacaine prior to YAG laser. No post-operative eye drops will be administered. A Karickhoff lens with goniosol will be used to perform the YAG vitreolysis. The number of shots will be determined at the discretion of the treating physician. Single shot mode will be used. The maximum energy per pulse will be 7 mJ. The endpoint of treatment is the disruption of the Weiss ring into smaller fragments as well as any other vitreous opacities deemed visually significant by the treating physician. Only one treatment session will be performed.

Sham laser treatment will be applied under the same procedure used for laser treatment but without switching on the laser beam and by imitating depression of the laser pedal.

---

**ENDPOINT(S)****Primary:**

To determine patients' subjective improvement in floater symptoms based on the floater-specific

questionnaire.

**Secondary:**

- Mean change in visual acuity from Baseline as measured by ETDRS vision testing at 6 months
  - Mean change in baseline in the National Eye Institute Visual Functioning Questionnaire-25 (NEI VFQ-25) near activities subscale
  - Mean change in baseline in the National Eye Institute Visual Functioning Questionnaire-25 (NEI VFQ-25) distance activities subscale
  - Qualitative changes on infrared and color photography
  - Incidence and severity of ocular and systemic adverse events
-

---

**PROCEDURES AND  
ASSESSMENTS**

At Baseline –

- Patients complete questionnaire regarding: duration of floater symptoms prior to presentation, severity of floater symptoms, number of floaters, and activity most inconvenienced by presence of floaters
- Medical, ocular history and demographics collected
- ETDRS and Snellen best-corrected visual acuity
- Optos (Scotland, UK) color photography
- Heidelberg Spectralis Optical Coherence Tomography (OCT) and infrared photo (Heidelberg Engineering, Germany)
- B scan ultrasound of Weiss ring with caliper measurement of nearest distance between: 1. Weiss ring and retina, 2. Weiss ring and posterior lens capsule (only in phakic eyes)
- Slit lamp and indirect ophthalmoscopy with scleral depression of study eye
- Applanation tonometry
- Visual Functioning Questionnaire-25 (VFQ 25)

At week 1, month 1, month 3

- Non-best-corrected Snellen visual acuity
- Slit lamp and indirect ophthalmoscopy with scleral depression of study eye
- Applanation tonometry

At month 6

- ETDRS and Snellen best-corrected visual
-

---

acuity

- Optos color photography
- Heidelberg Spectralis OCT and infrared photo
- Slit lamp and indirect ophthalmoscopy with scleral depression of study eye
- Applanation tonometry
- Assessment of floater symptoms questionnaire
- VFQ 25 questionnaire

---

**Statistical Plan**

This study will enroll 75 patients. Sample calculations show that 48 patients are needed to show a symptomatic improvement on a 10-point scale from 6 to 3 with a standard deviation of 3 with an alpha of 0.05 and power of 0.9. Further, 75 patients are needed to show a difference between YAG and sham groups at month 6 reporting partial success (30% improvement) and failure (10% improvement) with a standard deviation of 25%, alpha of 0.05, and power of 0.9.

---

315

316  
317  
318  
319  
320  
321  
322  
323  
324  
325  
326  
327  
328  
329  
330  
331

**TABLE OF CONTENTS**

**Clinical Study Protocol Synopsis..... 11**

**1. Introduction and Rationale..... 8**

**2. Study Objectives..... 10**

**3. Study Design..... 11**

**4. Selection, Withdrawal, and Replacement of Subjects ..... 13**

**5. Schedule of Events ..... 14**

**6. Study Visit Descriptions ..... 15**

**7. Ethical and Regulatory Considerations ..... 16**

**8. Protocol Amendments ..... 18**

**9. Study Documentation ..... 18**

**10. Appendix 1..... 19**

**11. Appendix 2.....20**

**12. References..... 21**

332 **2. INTRODUCTION AND RATIONALE**

333 **2.1 Introduction**

334 Changes in the vitreous occur throughout life and can often lead to symptomatic floaters.  
335 In youth, hyaluronan keeps collagen fibrils separated in the vitreous cavity to maintain  
336 transparency. With time, hyaluronan dissociates from collagen, causing crosslinking and  
337 aggregation of collagen with subsequent fibrous structures that scatter light<sup>i,ii,iii</sup>. This  
338 process of vitreous liquefaction is accelerated in myopia, with posterior vitreous  
339 detachment (PVD) developing 10-15 years earlier in myopes than emmetropes<sup>iv</sup>. A PVD  
340 is marked by the separation of the posterior cortical vitreous from the internal limiting  
341 membrane, due both to vitreous liquefaction and weakening of vitreous retinal adhesion.  
342 Clinically, a PVD is often marked by a certain degree of fibroglial tissue, known as a  
343 Weiss ring, free floating over the optic nerve. A PVD allows the vitreous body to move  
344 with head or eye movement; the Weiss ring and vitreous opacities cast shadows onto the  
345 retina, and are perceived as floaters.

346  
347 Symptomatic floaters significantly and negatively impact quality of life. Wagle and  
348 colleagues<sup>v</sup> evaluated the utility value of symptomatic floaters in a population of 266  
349 patients. Patients were willing to trade off an average of 1.1 years out of every 10 years  
350 of remaining life to eliminate their symptomatic floaters. They were willing to take an  
351 11% risk of death and 7% risk of blindness. These utility values were comparable to  
352 those reported by patients with age-related macular degeneration, diabetic retinopathy,  
353 hypertension, mild angina, mild stroke, colon cancer, and asymptomatic human  
354 immunodeficiency virus (HIV) infection. These results show that floaters negatively  
355 affect patients as much as significant ocular and systemic diseases. Further, there was no  
356 difference between acute and chronic floaters, challenging the widely held belief that  
357 floaters become less symptomatic with time.

358  
359 Presently, there are only three possible management options for patients with  
360 symptomatic floaters: observation, pars plana vitrectomy (PPV) either with a one-incision  
361 Intrector (Insight Instruments) or a standard three-port vitrector, and yttrium aluminum



362 garnet (YAG) vitreolysis. Koch presented results from a vitrectomy for floaters with an  
363 Intrector at the American Academy of Ophthalmology (AAO) meeting in 2013. The  
364 surgeon performs a one-step, one-incision, limited core vitrectomy while visualizing  
365 through an indirect ophthalmoscope. Of 20 patients, 85% were satisfied after the  
366 Intrector procedure. The remaining three dissatisfied patients underwent standard three-  
367 port PPV and were then satisfied. There were no reported complications after 2 years of  
368 follow-up.

369

370 Standard three-port PPV is the most definitive means to remove the vitreous and its  
371 symptomatic floaters, but does carry risk. Retinal detachment has been reported in  
372 between 2.5% and 10.9% of eyes post-operatively<sup>vi, vii, viii</sup>. Other studies, however, did  
373 not report retinal detachment after 25 gauge vitrectomy.<sup>ix, x</sup>

374

375 Some ophthalmologists are performing YAG vitreolysis to vitreous floaters in an effort to  
376 pulverize the fibroglial tissue. Little has been published on this technique. A rabbit  
377 model evaluated the effects of YAG laser on the protein and viscoelastic properties of the  
378 vitreous, and also the protective role of vitamin C against laser photodisruption<sup>xi</sup>. Eyes  
379 treated with 5 mJ x 100 pulses to the anterior vitreous showed no changes to the vitreous  
380 humour. Likewise, rabbits treated with 25 mg/kg body weight of vitamin C for 2 weeks  
381 prior to YAG showed no vitreous changes after the procedure. When YAG laser was  
382 applied to the mid-vitreous or the posterior vitreous, at doses of 5 mJ x 100 pulses or 10  
383 mg x 50 pulses, there was an increase in protein content, refractive index, and the  
384 viscosity of the vitreous humor.

385

386 The few cases series in the literature evaluating YAG for vitreous floaters in human  
387 subjects report some symptomatic success and a good safety profile. A single center  
388 retrospective case series evaluated the safety and efficacy of YAG laser in 39 eyes with  
389 symptomatic posterior vitreous detachments<sup>xii</sup>. The symptomatic floater had to be at least  
390 2 mm away from each the posterior lens capsule and retina. The maximum energy used  
391 per pulse was 1.2 mJ. Patients were allowed to have subsequent YAG laser sessions with  
392 a minimum interval of two months between sessions. The average power per treatment

393 session was 310.4 mJ (range 163– 875 mJ). The average number of treatment sessions  
394 per patient was 1.62 (range 1–6 sessions). At a mean of 26.6 months follow-up (range  
395 15–53 months) there were no post-operative complications. The researchers used a  
396 questionnaire to assess patient satisfaction, reporting that 7.7% of patients were  
397 subjectively worse, 53.8% were the same, 35.8% received moderate benefit (30–50%  
398 improvement), and 2.5% received significant benefit (50–70% improvement). In patients  
399 undergoing repeat YAG procedures, subsequent treatments were not associated with any  
400 further improvement in symptoms. Of those eyes with some degree of symptomatic  
401 improvement, only 6.6% proceeded to PPV compared to 47.8% of eyes that gained no  
402 clinical benefit. The researchers conclude YAG vitreolysis for symptomatic floaters is a  
403 safe and moderately effective procedure that leads to improvement in about one-third of  
404 patients. Given its safety profile, the researchers feel YAG vitreolysis is a worthwhile  
405 primary intervention given that it decreases the number of patients undergoing  
406 vitrectomy, which can potentially have more complications.

407 A Polish series of ten eyes reported only two patients after YAG vitreolysis reported  
408 persistent clouds in their visual field. The YAG power ranged from 3 mJ to 7 mJ for a  
409 single shot; the total energy required ranged from 56 mJ to 216 mJ<sup>xiii</sup>.

410

411 Another case series of 15 eyes used energy levels of 5 to 7.1 mJ with total energy ranging  
412 from 71 to 742 mJ. The authors report improved symptoms in all eyes with no  
413 complications after one-year follow-up<sup>xiv</sup>.

414

415 A study of ten eyes treated with YAG laser for symptomatic floaters utilized a scanning  
416 laser ophthalmoscope to identify the position, the size and the motility of the vitreous  
417 floaters. The authors found well-suspended floaters responded better YAG vitreolysis  
418 compared to ill-suspended vitreous floaters<sup>xv</sup>.

419

### 420 3. STUDY OBJECTIVES

421 This is a randomized, masked, sham-controlled trial evaluating the safety and efficacy of  
422 YAG vitreolysis for symptomatic Weiss ring due to posterior vitreous detachment. This

423 is a single-center trial that will take place at the Ophthalmic Consultants of Boston.  
424 Patients will be randomized in a 2:1 ratio to YAG vitreolysis versus sham YAG.

#### 425 **4. STUDY DESIGN**

##### 426 **4.1 Study Description and Duration**

427 Patients complete a questionnaire (see Appendix 2) at baseline and month 6 regarding:  
428 duration of their symptoms prior to presentation, laterality, severity and number of their  
429 floaters, and activity most inconvenienced by the presence of floaters<sup>xvi</sup>. These data,  
430 along with age, sex, and lens status, will serve as baseline characteristics.

431 ETDRS and Snellen best-corrected visual acuity (BCVA) will be checked at baseline and  
432 month 6. A B-scan will be performed at baseline to confirm the presence of a PVD and  
433 measure the distance of the symptomatic Weiss ring floater from the retina and posterior  
434 lens capsule. Spectralis Optical Coherence Tomography (OCT) and infrared photo  
435 (Heidelberg Engineering, Germany) will be checked at baseline and month 6. Optos  
436 (Scotland, UK) color photography will be checked at baseline and month 6. A slit lamp  
437 and indirect ophthalmoscope examination with scleral depression will be performed at  
438 baseline, week 1, month 1, month 3, and month 6, along with applanation tonometry.

439 Patients will be asked to quantify their post-operative improvement as a percentage as  
440 well as choose a descriptive analogy<sup>xvii</sup> at month 6. Options will include: (a) Worse:  
441 floaters are worse; (b) Failure: floaters are the same; (c) Partial success: some  
442 improvement but still floaters of moderate inconvenience; (d) Significant success:  
443 significant improvement with only slight inconvenience; (e) Complete success: complete  
444 resolution of floaters. The equivalent percentage improvements are worse or failure 0%,  
445 partial success 30–50%, significant success 50–70%, and complete success 100%. The  
446 percent improvements will be compared between YAG and sham groups.

447 Patients will also be asked to rate their disturbance by the floaters on a 0-10 scale, with 0  
448 being no symptoms to 10 being debilitating symptoms. Patients must report their  
449 disturbance to be at least a 4 out of 10. Patients will complete this question at baseline  
450 and at 6 months. Analyses will compare baseline to month 6 results in a paired analysis,

451 and also between YAG and sham groups at month 6.

452 Patients complete the Visual Functioning Questionnaire-25 (VFQ-25) at baseline and  
453 month 6. These results will be compared between YAG and sham groups in a  
454 comparative analysis, and between baseline and month 6 in a paired analysis.

455

456 The YAG vitreolysis will be performed using an Ellex laser. The maximum energy per  
457 pulse will be 7 mJ<sup>xviii</sup>. Patients will have an intraocular pressure check before and 30  
458 minutes ( $\pm 5$  minutes) after the procedure. Patients will be dilated with phenylephrine  
459 2.5% and tropicamide 1% and receive proparacaine prior to the YAG. There will be no  
460 post-operative drops. A Karickhoff lens will be used to perform the YAG vitreolysis. The  
461 number of shots will be determined at the discretion of the treating physician. The  
462 endpoint is disruption of the Weiss ring into smaller fragments, as well as disruption of  
463 any other visually significant appearing floaters at the discretion of the treating physician.  
464 Only one treatment session is permitted.

465

466 Patients will be followed by Snellen non-BCVA, applanation, and clinical examination at  
467 1 week, 1 month, 3 months, and 6 months (ETDRS and Snellen BCVA will be checked at  
468 6 month). All ocular and systemic adverse effects will be recorded. The primary  
469 endpoint will be patients' subjective improvement based on the two floater-specific  
470 questions. Secondary endpoints include VFQ-25 results, BCVA, qualitative changes on  
471 infrared and color photography, and adverse effects.

472 This study will enroll 75 patients. Sample size calculations show that 48 patients are  
473 needed to show a symptomatic improvement on a 10-point scale from 6 to 3 with a  
474 standard deviation of 3 with an alpha of 0.05 and power of 0.9. Further, 75 patients are  
475 needed to show a difference between YAG and sham groups at month 6 reporting partial  
476 success (30% improvement) and failure (10% improvement) with a standard deviation of  
477 25%, alpha of 0.05, and power of 0.9.

478

479 An interim analysis will be performed approximately one year after initiation of the  
480 study, in early 2016, and submitted for presentation at the American Society of Retina

481 Specialists annual meeting, Retina Society, and/or the American Academy of  
482 Ophthalmology annual meeting.

## 483 **5. SELECTION, WITHDRAWAL, AND REPLACEMENT OF SUBJECTS**

### 484 **5.1.1 Inclusion Criteria**

485 A subject must meet the following criteria to be eligible for inclusion in the study:

- 486 1. Symptoms of floaters that correlate to the presence of a posterior vitreous  
487 detachment for at least 6 months
- 488 2. Documented posterior vitreous detachment on clinical examination, OCT, and B  
489 scan
- 490 3. Self-rating of visual disturbance by the floaters must be at least 4 on a 0-10 scale,  
491 with 0 being no symptoms to 10 being debilitating symptoms.
- 492 4. Symptomatic Weiss ring (PVD) must be at least 3 mm away from the retina and 5  
493 mm from the posterior lens capsule of the crystalline lens, as measured on B-scan.  
494 For pseudophakic patients, there is no minimum required distance from the  
495 intraocular lens.
- 496 5. Able to position for the YAG laser procedure.
- 497 6. Accept the risks of YAG laser including but not limited to retinal detachment,  
498 intraocular hemorrhage, retinal damage, cataract formation, optic nerve damage,  
499 inflammation, and irreversible loss of vision.
- 500 7. Willing and able to comply with clinic visits and study-related procedures
- 501 8. If the patient has two symptomatic eyes, only one eye can be randomized and  
502 included in the study.
- 503 9. Provide signed informed consent

### 504 **5.1.2 Exclusion Criteria**

505 A subject who meets any of the following criteria will be excluded from the study:

- 506 1. Snellen best corrected visual acuity worse than 20/50 in the fellow eye

- 507 2. History of retinal tear, retinal detachment, or uveitis in the study eye
- 508 3. History of diabetic retinopathy, macular edema, retinal vein occlusion, or aphakia in
- 509 the study eye
- 510 4. History of glaucoma or high intraocular pressure defined as having a history of
- 511 glaucoma surgery or currently taking two or more topical glaucoma medications in
- 512 the study eye

513 **5. Table 1 Schedule of Events**

| Study Procedure                                             | Screening + Baseline | Week 1 (± 4 days) | Month 1 (± 7 days) | Month 3 (± 7 days) | Month 6 (± 7 days) |
|-------------------------------------------------------------|----------------------|-------------------|--------------------|--------------------|--------------------|
| Visit                                                       | Visit 1              | Visit 2           | Visit 3            | Visit 4            | Visit 5            |
| Inclusion/Exclusion                                         | X                    |                   |                    |                    |                    |
| Informed Consent                                            | X                    |                   |                    |                    |                    |
| Medical/Ocular History                                      | X                    |                   |                    |                    |                    |
| Demographics                                                | X                    |                   |                    |                    |                    |
| VFQ                                                         | X                    |                   |                    |                    | X                  |
| Floater Questionnaire                                       | X                    |                   |                    |                    | X                  |
| ETDRS & Snellen BCVA <sup>2</sup>                           | X                    |                   |                    |                    | X                  |
| Snellen non-BCVA <sup>2</sup>                               | X                    | X                 | X                  | X                  | X                  |
| Applanation Tonometry <sup>1</sup>                          | X                    | X                 | X                  | X                  | X                  |
| Ophthalmic Exam: SLE, DFE & Scleral Depression <sup>1</sup> | X                    | X                 | X                  | X                  | X                  |
| SD-OCT with infrared on Heidelberg Spectralis <sup>1</sup>  | X                    |                   |                    |                    | X                  |
| Optos photograph <sup>1</sup>                               | X                    |                   |                    |                    | X                  |
| Group 1 Administer YAG laser <sup>1</sup>                   | X                    |                   |                    |                    |                    |
| Group 2 Administer sham laser <sup>1</sup>                  | X                    |                   |                    |                    |                    |
| Adverse Events                                              | X                    | X                 | X                  | X                  | X                  |
| B scan ultrasound <sup>1</sup>                              | X                    |                   |                    |                    |                    |

514 <sup>1</sup>Study eye only

515 <sup>2</sup>Both eyes at screening; study eye only at subsequent visits

516

517 **6. Study Visit Descriptions**

518 **6.1 Screening + Baseline / Day 0**

519 After the subject has provided informed consent, the following information will be collected:

- 520 • Inclusion/exclusion
- 521 • Demographics
- 522 • Medical history, ocular history and concurrent illnesses

523 The following procedures and assessments will be conducted:

- 524 • Patients complete questionnaire regarding: duration of floater symptoms prior to  
525 presentation, severity of floater symptoms, number of floaters, and activity most  
526 inconvenienced by presence of floaters
- 527 • ETDRS and Snellen best corrected visual acuity (BCVA) testing (both eyes)
- 528 • Ophthalmic exam including slit lamp exam (SLE) and depressed dilated fundus exam  
529 (DFE) (study eye)
- 530 • Spectral-domain optical coherence tomography (SD-OCT) on Spectralis Heidelberg  
531 (study eye)
- 532 • Optos photograph (study eye)
- 533 • B scan ultrasound (study eye)
- 534 • Applanation tonometry (study eye)
- 535 • VFQ 25
- 536 • Laser treatment or sham treatment if eligible (study eye)
- 537 • Documentation of laser procedure specifications used

538 **6.2 Week 1, Month 1, 3**

- 539 • Snellen non-best-corrected visual acuity (study eye)
- 540 • Slit lamp and indirect ophthalmoscopy with scleral depression (study eye)
- 541 • Applanation tonometry (study eye)
- 542 • Adverse effects

543 **6.3 Month 6**

- 544 • ETDRS and Snellen best-corrected visual acuity (study eye)
- 545 • Optos color photography (study eye)
- 546 • Heidelberg Spectralis OCT and infrared photo (study eye)
- 547 • Slit lamp and indirect ophthalmoscopy with scleral depression (study eye)
- 548 • Applanation tonometry (study eye)
- 549 • Assessment of floater symptoms questionnaire
- 550 • VFQ 25

551 All attempts should be made to keep subjects on the study schedule.

552

553 **5. ETHICAL AND REGULATORY CONSIDERATIONS**

554 **5.1 Good Clinical Practice Statement**

555 It is the responsibility of the investigator(s) to ensure that this clinical study will be  
556 conducted in accordance with the ethical principles that have their origin in the  
557 Declaration of Helsinki, and that are consistent with the International Conference on  
558 Harmonisation (ICH) guidelines for Good Clinical Practice (GCP) and applicable  
559 regulatory requirements.

560

561 **5.2 Informed Consent**

562 The principles of informed consent as described in ICH Guidelines for GCP will be  
563 followed.

564

565 It is the responsibility of the investigator or designee (if acceptable by local regulations)  
566 to obtain written informed consent from each patient prior to his/her participation in the  
567 study and after the aims, methods, objectives, and potential hazards of the study have  
568 been explained to the patient in language that he/she can understand. The Informed  
569 Consent Form (ICF) will be signed and dated by the patient and by the investigator or  
570 authorized designee who reviewed the ICF with the patient.

571



572 Patients who can write but cannot read will have the ICF read to them before signing and  
573 dating the ICF.

574

575 Patients who can understand but who can neither write nor read will have the ICF read to  
576 them in presence of an impartial witness, who will sign and date the ICF to confirm that  
577 informed consent was given.

578

579 The original ICF will be retained by the investigator as part of the patient's study record,  
580 and a copy of the signed ICF will be given to the patient.

581 If new safety information results in significant changes in the risk/benefit assessment, the  
582 ICF will be reviewed and updated appropriately. All study patients will be informed of  
583 the new information and provide their written consent if they wish to continue in the  
584 study. The original signed revised ICF will be maintained in the patient's study record  
585 and a copy will be given to the patient.

586

### 587 **5.3 Subject Confidentiality and Data Protection**

588 The investigator will take all appropriate measures to ensure that the anonymity of each  
589 study subject will be maintained.

590

591 The patient's and investigator's personal data will be treated in compliance with all  
592 applicable laws and regulations.

593

### 594 **5.4 Institutional Review Board**

595 An appropriately constituted Institutional Review Board (IRB), as described in ICH  
596 Guidelines for GCP, will review and approve:

- 597 • The protocol, ICF, and any other materials to be provided to the patients  
598 (e.g. advertising) before any patient may be enrolled in the study
- 599 • Any amendment or modification to the study protocol or ICF before implementation,  
600 unless the change is necessary to eliminate an immediate hazard to the patients, in  
601 which case the IRB will be informed as soon as possible

602

603 Ongoing studies will be reviewed by the IRB/EC on an annual basis or at intervals  
604 appropriate to the degree of risk.

605

606 In addition, the IRB will be informed of any event likely to affect the safety of patients or  
607 the continued conduct of the clinical study.

608

609

## 610 **6. PROTOCOL AMENDMENTS**

611 The investigator will not implement a change in the design or operation of the protocol or  
612 ICF without an IRB-approved amendment.

613

## 614 **7. STUDY DOCUMENTATION**

### 615 **7.1 Retention of Records**

616 The investigator will retain all essential study documents, including ICFs, source  
617 documents, Case Report Forms (CRFs), and drug accountability records for at least  
618 2 years following the completion or discontinuation of the study, or longer if a longer  
619 period is required by relevant regulatory authorities. Records will be destroyed in a  
620 manner that ensures confidentiality.

621

622

623

## APPENDIX 1: YAG LASER PROCEDURE

624

625 The following procedures will be implemented to minimize the risk of potential adverse  
626 events associated with YAG laser treatment of Weiss ring.

627

- Verify study eye

628

- Instill 2 drops of 0.5% proparacaine hydrochloride into the study eye

629

- Fill Karickhoff lens half-way with goniosol

630

For YAG laser treatment:

631

- Single shot mode with a maximum pulse energy of 7 mJ per pulse. The treating  
632 physician will start at 1 mJ and titrate up until he/she reaches enough power to achieve  
633 disruption of the Weiss ring.

634

- The endpoint of treatment is the disruption of the Weiss ring into smaller fragments as  
635 well as any other vitreous opacities deemed visually significant by the treating physician.

636

Only one treatment session will be performed.

637

- At the end of the treatment: record total energy (in mJ), energy per shot (in mJ), and  
638 total number of shots

639

- Obtain IOP by applanation tonometry 30 minutes ( $\pm$  5 minutes) after treatment

640

641

For sham laser treatment:

642

- Sham laser treatment will be applied under the same procedure used for laser treatment  
643 but without switching on the laser beam and by imitating depression of the laser pedal.

644

645

646

## Appendix 2: Floater Questionnaire

647

### Baseline:

648

1. How long have you had symptomatic floaters?

649

2. Do you have symptomatic floaters in the right, left, or both eyes?

650

3. Which eye is more symptomatic? Right or left or both equally symptomatic

651

4. How many floaters do you have in the more symptomatic eye (or the study eye if both eyes equally affected)?

652

653

5. What activity is most inconvenienced by the presence of floaters?

654

6. Please rate your visual disturbance by the floaters on a 0-10 scale, with 0 being no symptoms to 10 being debilitating symptoms.

655

656

### Month 6:

657

1. Please rate your visual disturbance by the floaters on a 0-10 scale, with 0 being no symptoms to 10 being debilitating symptoms.

658

659

2. Please quantify your post-operative improvement as a percentage.

660

3. How would you describe your floaters today compared to right before the laser procedure?

661

662

a. Floaters are worse

663

b. Floaters are the same

664

c. Some improvement but still floaters of moderate inconvenience

665

d. Significant improvement with floaters only of slight inconvenience

666

e. Complete resolution of floaters

667

---

## 12. REFERENCES

- <sup>i</sup> Sebag J, Yee K. Vitreous-from biochemistry to clinical relevance. In: Tasman W, Jaeger EA, eds. Duane's foundation of clinical ophthalmology. Volume 1. Philadelphia: Lippincott Williams & Wilkins; 1998: 1-34.
- <sup>ii</sup> Los LI, van der Worp RJ, van Luyn MJ, Hooymans JM. Age-related liquefaction of the human vitreous body: LM and TEM evaluation of the role of proteoglycans and collagen. *Invest Ophthalmol Vis Sci.* 2003 Jul;44(7):2828-33.
- <sup>iii</sup> van Deemter M, Kuijer R, Harm Pas H, Jacoba van der Worp R, Hooymans JM, Los LI. Trypsin-mediated enzymatic degradation of type II collagen in the human vitreous. *Mol Vis.* 2013 Jul 20;19:1591-9. Print 2013.
- <sup>iv</sup> Sebag J, Yee K. Vitreous-from biochemistry to clinical relevance. In: Tasman W, Jaeger EA, eds. Duane's foundation of clinical ophthalmology. Volume 1. Philadelphia: Lippincott Williams & Wilkins; 1998: 1-34.
- <sup>v</sup> Wagle AM, Lim WY, Yap TP, Neelam K, Au Eong KG. Utility values associated with vitreous floaters. *Am J Ophthalmol.* 2011 Jul;152(1):60-65.e1.
- <sup>vi</sup> de Nie KF, Crama N, Tilanus MA, Klevering BJ, Boon CJ. Pars plana vitrectomy for disturbing primary vitreous floaters: clinical outcome and patient satisfaction. *Graefes Arch Clin Exp Ophthalmol.* 2013 May;251(5):1373-82.
- <sup>vii</sup> Schulz-Key S, Carlsson JO, Crafoord S. Longterm follow-up of pars plana vitrectomy for vitreous floaters: complications, outcomes and patient satisfaction. *Acta Ophthalmol.* 2011 Mar;89(2):159-65.
- <sup>viii</sup> Tan HS, Mura M, Lesnik Oberstein SY, Bijl HM. Safety of vitrectomy for floaters. *Am J Ophthalmol.* 2011 Jun;151(6):995-8.
- <sup>ix</sup> Mason JO 3rd, Neimkin MG, Mason JO 4th, Friedman DA, Feist RM, Thomley ML, Albert MA. Safety, efficacy, and quality of life following sutureless vitrectomy for symptomatic vitreous floaters. *Retina.* 2014 Jun;34(6):1055-61.
- <sup>x</sup> Sebag J, Yee KM, Wa CA, Huang LC, Sadun AA. Vitrectomy for floaters: Prospective Efficacy Analyses and Retrospective Safety Profile. *Retina.* 2014 Jun;34(6):1062-8.

---

<sup>xi</sup> Abdelkawi SA, Abdel-Salam AM, Ghoniem DF, Ghaly SK. Vitreous humor rheology after Nd:YAG laser photo disruption. *Cell Biochem Biophys*. 2014 Mar;68(2):267-74.

<sup>xii</sup> Delaney YM, Oyinloye A, Benjamin L. Nd:YAG vitreolysis and pars plana vitrectomy: surgical treatment for vitreous floaters. *Eye (Lond)*. 2002 Jan;16(1):21-6.

<sup>xiii</sup> Toczowski J, Katski W. Use of Nd:YAG laser in treatment of vitreous floaters. *Klin Oczna*. 1998;100(3):155-7.

<sup>xiv</sup> Tsai WF, Chen YC, Su CY. Treatment of vitreous floaters with neodymium YAG laser. *Br J Ophthalmol*. 1993 Aug;77(8):485-8.

<sup>xv</sup> Vandorselaer T, Van De Velde F, Tassignon MJ. Eligibility criteria for Nd-YAG laser treatment of highly symptomatic vitreous floaters. *Bull Soc Belge Ophtalmol*. 2001;(280):15-9.

<sup>xvi</sup> Delaney YM, Oyinloye A, Benjamin L. Nd:YAG vitreolysis and pars plana vitrectomy: surgical treatment for vitreous floaters. *Eye (Lond)*. 2002 Jan;16(1):21-6.

<sup>xvii</sup> Delaney YM, Oyinloye A, Benjamin L. Nd:YAG vitreolysis and pars plana vitrectomy: surgical treatment for vitreous floaters. *Eye (Lond)*. 2002 Jan;16(1):21-6.

<sup>xviii</sup> Tsai WF, Chen YC, . Treatment of vitreous floaters with neodymium YAG laser. *Br J Ophthalmol*. 1993 Aug;77(8):485-8.
