# Supplementary material
Source: PubMed Central journal article supplement (PMC5710539)

## Supplementary Online Content

Shah CP, Heier JS. YAG laser vitreolysis vs sham YAG vitreolysis for symptomatic vitreous floaters: a randomized clinical trial. *JAMA Ophthalmol*. Published online July 20, 2017. doi:10.1001/jamaophthalmol.2017.2388

**eFigure.** Percentage of Postoperative Improvement in YAG Vitreolysis and Sham Groups at 6 Months

This supplementary material has been provided by the authors to give readers additional information about their work.

**eFigure.** Percentage of Postoperative Improvement in YAG Vitreolysis and Sham Groups at 6 Months

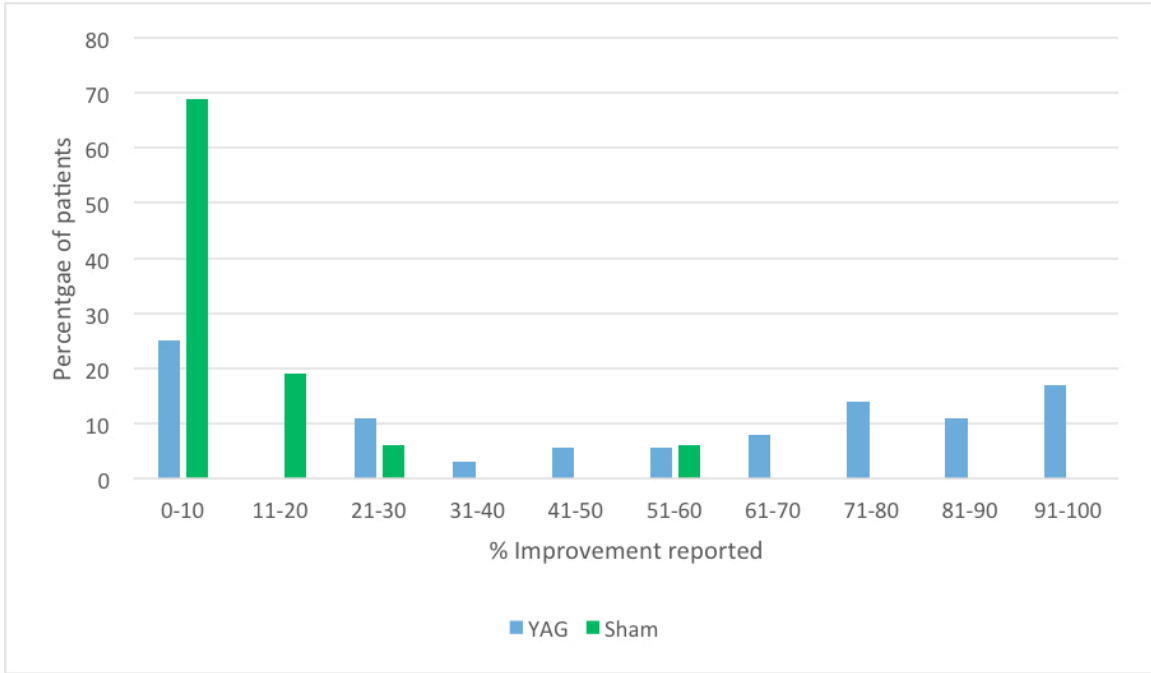

Supplement: jamaophthalmol-135-918-s002.pdf [file jamaophthalmol-135-918-s002.pdf]
